# Supplementary material
Source: Springer Nature journal article supplement (https://www.springermedizin.de/resource/supplementary/12967_2014_2111_MOESM2_ESM.pdf/9575048)

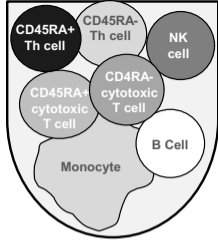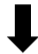

Cytokines  
IFN- $\alpha$ , IL-2, IL-4, IL-6, IL-27

TLR 7/8 Signaling  
R848

PMA

BCR Signaling

TCR Signaling

p-Stat1  
p-Stat3  
p-Stat5  
p-Stat6

p-NFkB  
p-Erk

p-Erk  
p-S6

p-Erk  
p-ZAP70/p-SYK

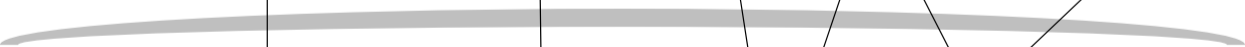

Supplement: MOESM2 [file 9575048]
